# Supplementary material
Source: MDPI journal article supplement (https://www.mdpi.com/2075-5309/14/4/1157)
Supplement: s1 [file s1]

*Supplementary Material*

# **Energy Performance and Comfort Analysis of Three Glazing Materials with Distinct Thermochromic Responses as Roller Shade Alternative in Cooling- and Heating-Dominated Climates**

**Thilhara Tennakoon<sup>1</sup>, Yin-Hoi Chan<sup>1</sup>, Ka-Chung Chan<sup>1</sup>, Chili Wu<sup>1</sup>, Christopher Yu-Hang Chao<sup>1,2</sup> and Sau-Chung Fu<sup>1,\*</sup>**

<sup>1</sup> Department of Building Environment and Energy Engineering, The Hong Kong Polytechnic University, Hong Kong, China; thilhara.tennakoon@polyu.edu.hk (T.T.); kristyc.chan@polyu.edu.hk (Y.H.C.); oscar-kc.chan@polyu.edu.hk (K.C.C.); chili.wu@polyu.edu.hk (C.W.); christopher.chao@polyu.edu.hk (C.Y.H.C.)

<sup>2</sup> Department of Mechanical Engineering, The Hong Kong Polytechnic University, Hong Kong, China

\* Correspondence: chung.fu@polyu.edu.hk

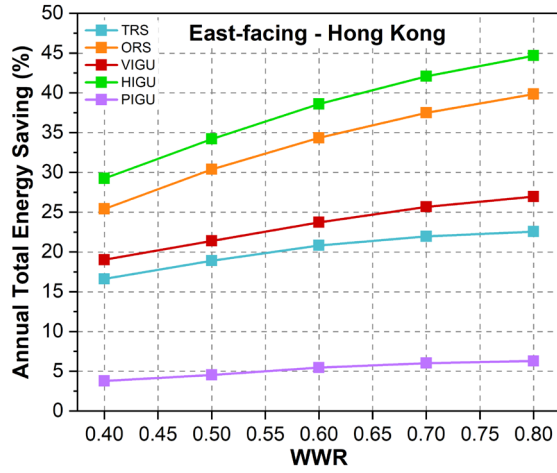

(a)

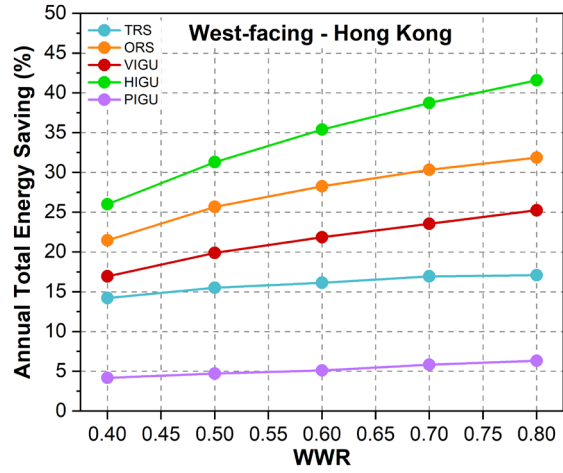

(b)

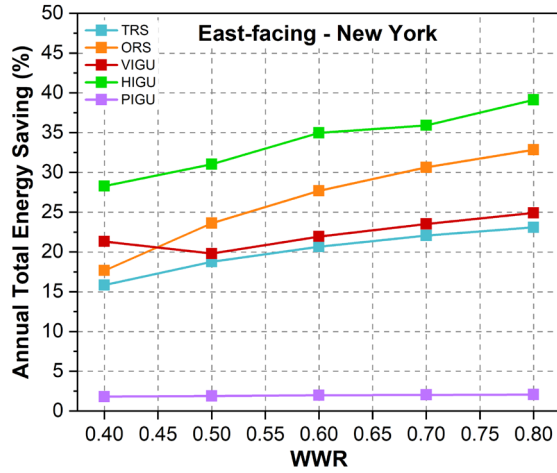

(c)

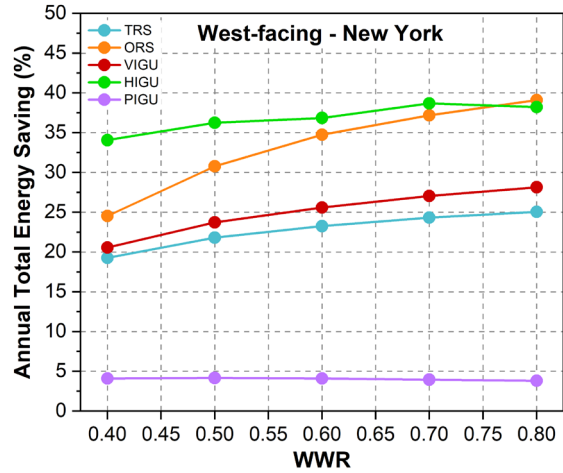

(d)

**Figure S1.** Annual site energy savings for east and west-facing windows as a function of WWR and window construction in (a, b) Hong Kong and (c, d) New York.

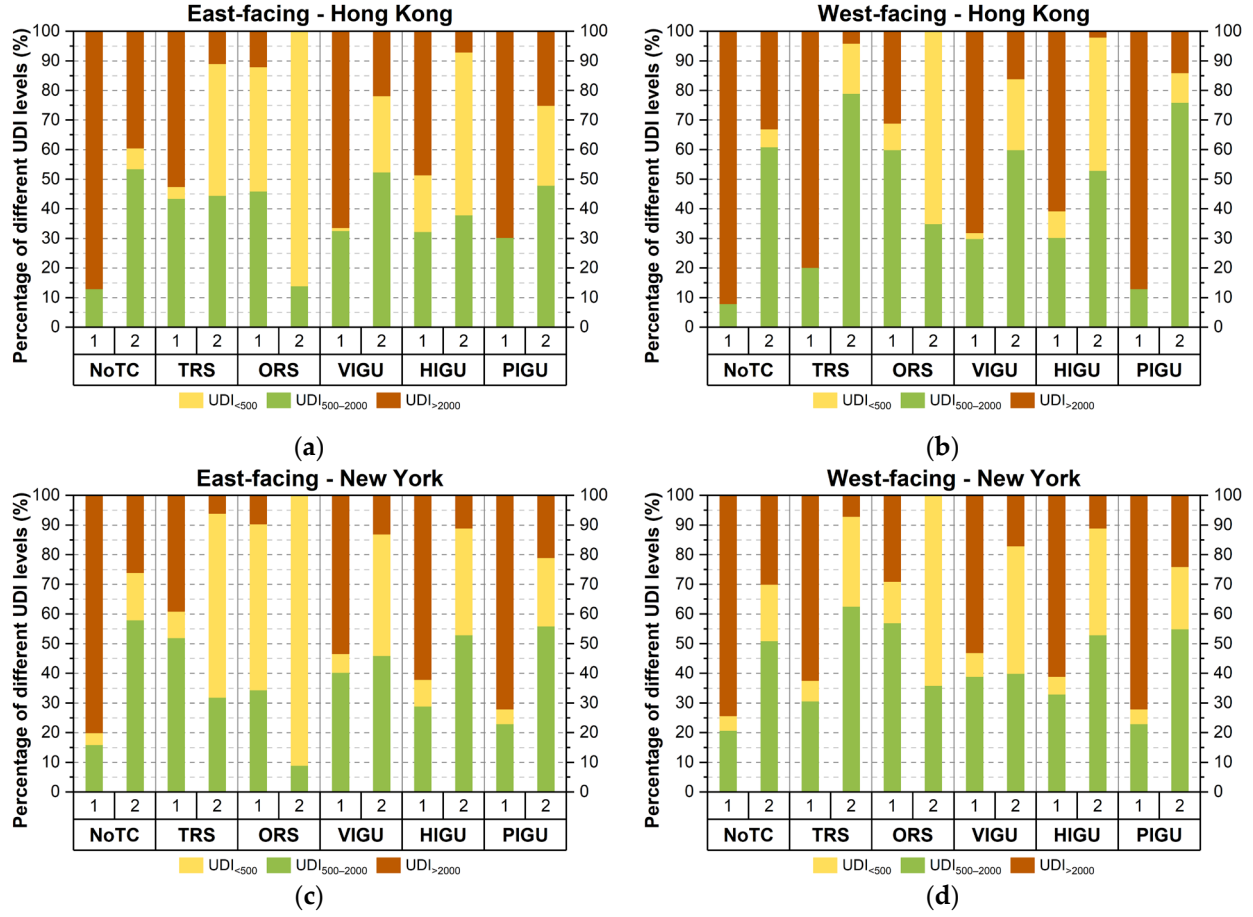

**Figure S2.** Percentage of underlit ( $UDI_{<500}$ ), well-lit ( $UDI_{500-2000}$ ) and over-lit ( $UDI_{>2000}$ ) office hours for east- and west-facing windows in (a, b) Hong Kong and (c, d) New York.

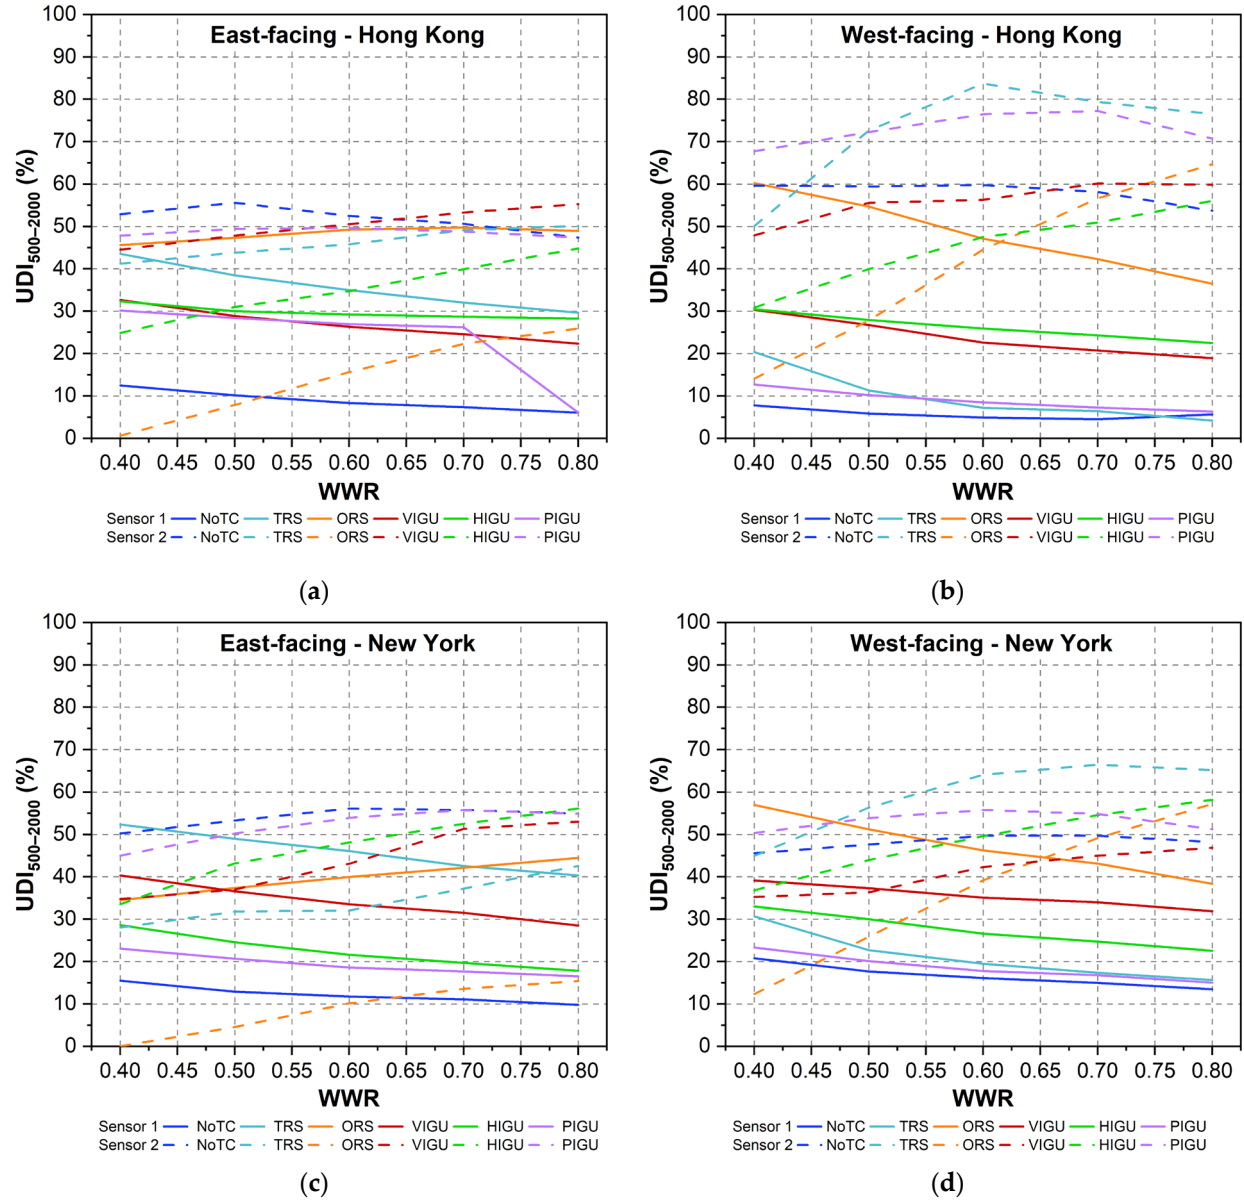

**Figure S3.** Daylighting performance for east- and west-facing windows in (a, b) Hong Kong and (c, d) New York measured by Sensor 1 (solid line) and Sensor 2 (dashed line).
